# Supplementary material for: Efficient synthesis of a nucleoside-diphospho-exo-glycal displaying time-dependent inactivation of UDP-galactopyranose mutase
Source: Royal Society of Chemistry journal article supplement (doi:10.1039/b402469a), 2004-01-01
Supplement: b402469a.doc [file b402469a.doc]

# Supporting Information

Efficient synthesis of a nucleoside-diphospho-*exo*glycal displaying time-dependent inactivation of UDP-Galactopyranose Mutase

Audrey Caravano, Stéphane P. Vincent* and Pierre Sinaÿ**a*

Ecole Normale Supérieure, Département de Chimie, UMR-8642 du CNRS, 24 rue Lhomond, 75231 Paris Cedex 05, France. Fax: 33 (0)1 44 32 33 97; E-mail: svincent@junie.ens.fr

**Materials and procedures** – All chemicals were purchased from Sigma, Aldrich or Fluka and were used without further purification. Tetrahydrofuran, diethyl ether and toluene were freshly distilled over sodium benzophenone, dichloromethane over P2O5 and acetonitrile over CaH2.1H-, 13C- and 31P-NMR spectra were recorded with Bruker AC-250 and AMX-400 spectrometers. All compounds were characterized by 1H, 13C, 31P NMR as well as by 1H-1H and 1H-13C correlation experiments. Specific optical rotations were measured on a Perkin Elmer 241 Polarimeter in a 1 dm cell. Melting points were determined with a Büchi 535 apparatus. Column chromatographies were performed on silica gel Kieselgel Si 60 (40-63 m). Size exclusion chromatographies were accomplished on a Sephadex G15 column (2.5*60cm) using a Pharmacia Biotech Äkta FPLC apparatus, the fractions containing uridine derivatives were detected by UV. When required, purifications of nucleotide-sugars were realized by semi-preparative HPLC, using a Waters Delta prep 4000 chromatography system equipped with a NovaPack C18 (1*10cm) column (eluant : triethylammonium acetate 50 mM, pH = 6.8). For enzymatic assays, a Waters 600 E analytical apparatus equipped with a Zorbax C18-SB column (25*0.46 cm, 5 m) was used (eluant : triethylammonium acetate 50 mM, pH = 6.8). UDP-Gal*f* was prepared according to known procedures.1

**Inhibition and Kinetic Analysis of Inactivation of UDP-Galactopyranose Mutase by UDP-exoglycalGal*f*** (**1**).

For the kinetic analysis of inactivation of UDP-Galpyranose mutase, we followed conditions described by Liu *et al*.1,2 The inactivation properties were determined by incubating a series of samples containing the purified mutase (15 M) and compound **1** at five different concentrations : 0.4, 0.6, 0.8, 1.0, 2.2 mM in a total volume of 20 L of 100 mM potassium phosphate buffer (pH 7.4) in the dark at 22°C in aerobic conditions. At incubation times comprised between 0 and 10 min, UDP-Gal*f* (1 mM) was added to initiate the reaction and the resulting mixture was frozen with liquid nitrogen to terminate the reaction (typical reaction time: 20 min). The reaction mixture was analyzed by HPLC eluted with 0.5% acetonitrile in 50 mM triethylammonium acetate buffer, pH 6.8. The detector was set at 262 nm, and the flow rate was 1.0 mL/min. The extent of conversion was determined by comparing the integration of the substrate and products peaks.

**Test for Reversibility of the Inactivation by UDP-exoglycalGal*f***: A sample containing UDP-exoglycalGal*f* (**1**, 3 mM) and mutase (15 M) was incubated for 1 h on ice in the dark in aerobic conditions. The inactivated enzyme was dialyzed against 250 mL of 50 mM potassium phosphate buffer containing 5% glycerol (pH 7.3) over 8 h with three changes of buffer. The residual enzyme activity was determined prior to and after the dialysis. A control experiment was also performed under identical conditions without the inactivator. It was noticed that the activity of the control sample decreased significantly (>50%) when the dialysis was allowed to run for longer than 8 h.

**Synthesis of UDP-*exoglycal*Galactofuranose**

(**2)** and (**4**) were previously reported.1

(**3)(1(1’)*Z*)-1-(dibenzyloxyphosphoryl)methylidene-2,3,4,6-Tetra-*O*-*tert*-butyldimethylsilyl-D-galactofuranose**

D21 +6.4 (c 1.1, CHCl3); 1H-NMR (400 MHz, CDCl3) 7.38-7.30 (m, 10H, H arom.), 5.09 (ABX, *J*H-P = 7.4 Hz, *J*H-H = 12.0 Hz, 2H, C*H2*Ph), 5.02 (ABX, *J*H-P = 7.9 Hz, *J*H-H = 12.0 Hz, 2H, C*H2*Ph), 4.61 (dd, *J*1’-2 = 1.1 Hz, *J*1’-P = 10.5 Hz, 1H, H-1’), 4.47 (dt, *J*1’-2 = 1.1 Hz, *J*2-P = *J*2-3 = 3.9 Hz, 1H, H-2), 4.41 (t, *J*3-4 = *J*4-5 = 3.9 Hz, 1H, H-4), 4.33 (dt, *J*2-3 = *J*3-4 = 3.9 Hz, *J*3-P = 0.6 Hz, 1H, H-3), 3.92 (dt, *J*5-6a = 7.0 Hz, *J*5-6b = 4.6 Hz, 1H, H-5), 3.77 (ABX, *J*5-6a = 7.0 Hz, *J*6a-6b = 10.2 Hz, 1H, H-6a), 3.65 (ABX, *J*5-6b = 4.6 Hz, *J*6a-6b = 10.2 Hz, 1H, H-6b), 0.94 (s, 9H, Si-*t*Bu), 0.92 (s, 9H, Si-*t*Bu), 0.90 (s, 9H, Si-*t*Bu), 0.88 (s, 9H, Si-*t*Bu), 0.16 (s, 6H, 2Si-Me), 0.13 (s, 3H, Si-Me), 0.12 (s, 3H, Si-Me), 0.11 (s, 3H, Si-Me), 0.09 (s, 3H, Si-Me), 0.08 (s, 3H, Si-Me), 0.02 (s, 3H, Si-Me); 13C-NMR (100 MHz, CDCl3)  173.03 (d, *J*1-P = 2.6 Hz, C-1), 136.93 (d, *J*C-P = 7.3 Hz, Cq arom.), 136.91 (d, *J*C-P = 7.5 Hz, Cq arom.), 128.23-127.57 (10 CH arom.), 90.27 (C-4), 81.78 (d, *J*1’-P = 195.7 Hz, C-1’), 81.05 (d, *J*2-P = 13.9 Hz, C-2), 76.39 (C-3), 72.57 (C-5), 66.63 (d, *J*C-P = 4.5 Hz, *C*H2Ph), 66.60 (d, *J*C-P = 5.0 Hz, *C*H2Ph), 64.39 (C-6), 25.93 (Si-C(*C*H3)3), 25.82 (Si-C(*C*H3)3), 25.66 (2Si-C(*C*H3)3), 18.28 (Si-*C*(CH3)3), 18.05 (Si-*C*(CH3)3), 17.83 (Si-*C*(CH3)3), 17.72 (Si-*C*(CH3)3), -3.82 (Si-Me), -4.02 (Si-Me), -4.34 (Si-Me), -4.38 (Si-Me), -4.41 (Si-Me), -4.81 (Si-Me), -5.40 (Si-Me), -5.42 (Si-Me); 31P-NMR (100 MHz, CDCl3)  19.80; MS (DCI-NH3): m/z 893 M + H+; elemental analysis for C45H81O8PSi4: calcd. (%) C 60.49 H 9.14. meas. C 60.36 H 9.27.

(**5) (1(1’)*Z*)-1-(dibenzyloxyphosphoryl)methylidene-D-galactofuranose**

D20 +19.9 (c 1.4, CHCl3); 1H-NMR (400 MHz, CD3OD) 7.55-7.49 (m, 10H, H arom.), 5.22-5.18m, 4H, C*H2*Ph), 4.90 (dd, *J*1’-2 = 1.6 Hz, *J*1’-P = 11.4 Hz, 1H, H-1’), 4.65 (ddd, *J*1’-2 = 1.6 Hz, *J*2-3 = 7.9 Hz, *J*2-P = 4.2 Hz, 1H, H-2), 4.38-4.33 (m, *J*3-4 = 5.6 Hz, *J*4-5 = 1.9 Hz, 2H, H-3, H-4), 3.94 (ddd, *J*4-5 = 1.9 Hz, *J*5-6a = 7.3 Hz, *J*5-6b = 5.8 Hz, 1H, H-5), 3.86 (m, 2H, *J*6a-6b = 6.3 Hz, H-6a, H-6b); 13C-NMR (100 MHz, CD3OD)  176.91 (d, *J*1-P = 1.9 Hz, C-1), 138.15 (d, *J*C-P = 7.2 Hz, Cq arom.), 138.08 (d, *J*C-P = 7.0 Hz, Cq arom.), 129.85-129.20 (10 CH arom.), 86.16 (C-4), 80.53 (d, *J*1’-P = 195.7 Hz, C-1’), 79.12 (d, *J*2-P = 12.9 Hz, C-2), 75.62 (C-3), 71.50 (C-5), 69.00 (d, *J*C-P = 5.2 Hz, *C*H2Ph), 68.74 (d, *J*C-P = 5.2 Hz, *C*H2Ph), 63.99 (C-6); 31P-NMR (100 MHz, CDCl3)  21.35; MS (DCI- NH3): m/z 437 100% M + H+, 454 55% M + NH4+; HRMS for C21H26O8P: calcd. 437.1365 meas. 437.1372; MS (negatif ESI): m/z 435 (M - H)-; HRMS for C21H24O8P: calcd. 435.12088 meas. 435.12178.

(**6) (1(1’)*Z*)-1-(phosphoryl)methylidene-2,3,4,6-Tetra-*O*-*tert*-butyldimethylsilyl-D-galactofuranose**

D21 +8.2 (c 0.75, CHCl3); (1.5éq. NEt3) 1H-NMR (400 MHz, CDCl3) 4.76 (d, *J*1’-P = 7.8 Hz, 1H, H-1’), 4.40 (bt, 1H, H-2), 4.27 (t, *J*3-4 = *J*4-5 = 3.8 Hz, 1H, H-4), 4.22 (t, *J*2-3 = *J*3-4 = 3.8 Hz, 1H, H-3), 3.90 (ddd, *J*5-6b = 4.9 Hz, 1H, H-5), 3.77 (ABX, *J*5-6a = 6.4 Hz, *J*6a-6b = 10.2 Hz, 1H, H-6a), 3.65 (ABX, *J*5-6b = 4.9 Hz, *J*6a-6b = 10.2 Hz, 1H, H-6b), 3.10 (q, *J*= 7.2 Hz, CH2, NEt3), 1.36 (t, *J*= 7.2 Hz, CH3,NEt3), 0.90 (s, 9H, Si-*t*Bu), 0.89 (s, 18H, 2Si-*t*Bu), 0.87 (s, 9H, Si-*t*Bu), 0.16 (s, 3H, Si-Me), 0.14 (s, 3H, Si-Me), 0.13 (s, 3H, Si-Me), 0.11 (s, 3H, Si-Me), 0.10 (s, 3H, Si-Me), 0.09 (s, 3H, Si-Me), 0.08 (s, 3H, Si-Me), 0.07 (s, 3H, Si-Me); 13C-NMR (100 MHz, CDCl3)  165.71 (d, *J*1-P = 2.7 Hz, C-1), 92.18 (d, *J*1’-P = 183.9 Hz, C-1’), 88.03 (C-4), 79.95 (d, *J*2-P = 12.6 Hz, C-2), 77.05 (C-3), 73.06 (C-5), 64.75 (C-6), 45.28 (CH2, NEt3), 26.04 (Si-C(*C*H3)3), 25.97 (Si-C(*C*H3)3), 25.80 (Si-C(*C*H3)3), 25.72 (Si-C(*C*H3)3),18.30 (Si-*C*(CH3)3), 18.23 (Si-*C*(CH3)3), 17.85 (Si-*C*(CH3)3), 17.83 (Si-*C*(CH3)3), 8.56 (CH3, NEt3), 0.97 (Si-Me), -3.85 (Si-Me), -4.01 (Si-Me), -4.04 (Si-Me), -4.25 (Si-Me), -4.41 (Si-Me), -4.48 (Si-Me), -4.57 (Si-Me); 31P-NMR (100 MHz, CDCl3)  13.52; MS (positif FAB): m/z 713 M + H+; HRMS for C31H70O8Si4P: calcd.713.3885 meas. 713.3871; MS (negatif ESI): m/z 711 (M - H)-; HRMS for C31H68O8Si4P: calcd.711.37288 meas. 711.37315.

**(7) (1(1’)*Z*)-1-(phosphoryl)methylidene-D-galactofuranose bis tributylammonium salt**

Dxx -2.0 (c 1.03, H2O); 1H-NMR (400 MHz, D2O) 4.68 (dd, *J*1’-2 = 1.6 Hz, *J*1’-P = 8.7 Hz, 1H, H-1’), 4.55 (ddd, *J*1’-2 = 1.6 Hz, *J*2-P = 4.1 Hz, *J*2-3 = 7.9 Hz, 1H, H-2), 4.10-4.06 (m, 2H, H-3, H-4), 3.81 (ddd, *J*4-5 = 2.5 Hz, *J*5-6a = 5.0 Hz, *J*5-6b = 7.3 Hz, 1H, H-5), 3.74 (ABX, *J*5-6a = 5.0 Hz, *J*6a-6b = 11.7 Hz, 1H, H-6a), 3.70 (ABX, *J*5-6b = 7.3 Hz, *J*6a-6b = 11.7 Hz, 1H, H-6b), 3.10 (m, CH2(d)), 1.64 (m, CH2(c)), 1.34 (sex, *J* = 7.4 Hz, CH2(b)), 0.90 (t, *J* = 7.4 Hz, CH3(a)); 13C-NMR (100 MHz, D2O)  166.15 (d, *J*1-P = 2.2 Hz, C-1), 89.18 (d, *J*1’-P = 180.6 Hz, C-1’), 82.39 (C-4), 76.60 (d, *J*2-P = 11.8 Hz, C-2), 74.28 (C-3), 70.44 (C-5), 62.40 (C-6), 52.98 (CH2(d)), 25.53 (CH2(c)), 19.61 (CH2(b)), 13.11 (CH3(a)); 31P-NMR (100 MHz, D2O) 11.38; MS (negatif FAB): m/z 255 (M - H)-; HRMS for C7H12O8P: calcd. 255.0270 meas. 255.0277.

**(1) Uridine 5’-(*Z*)-2,5-anhydro-1-deoxy-D-*galactose*-hept-1-enitol-1-yl phosphono phosphate**

1H-NMR (400 MHz, D2O) d*J*5’’-6’’ = 8.1 Hz, 1H, H-6’’), 5.95 (d*J*1’-2’ = 4.1 Hz, 1H, H-1’), 5.93 (d, *J*5’’-6’’ = 8.1 Hz, 1H, H-5’’), 4.78 (dd, *J*1exo-2 = 0.9 Hz, 1H, H-1*exo*), 4.54 (ddd, *J*2-P = 4.1 Hz, 1H, H-2), 4.34-4.30 (m, 2H, H-2’, H-3’), 4.23-4.11 (m, 3H, H-4’, H-5’a, H-5’b), 4.10-4.08 (m, 2H, H-3, H-4), 3.78 (ddd, *J*4-5 = 2.9 Hz, *J*5-6a = 4.9 Hz, *J*5-6b = 7.2 Hz, 1H, H-5), 3.73 (ABX, *J*5-6a = 4.9 Hz, *J*6a-6b = 11.6 Hz, 1H, H-6a), 3.70 (ABX, *J*5-6b = 7.2 Hz, *J*6a-6b = 11.6 Hz, 1H, H-6b), 3.16 (q, *J* = 7.3 Hz, CH2, NEt3), 1.23 (t, *J* = 7.3 Hz, CH3, NEt3); 13C-NMR (100 MHz, D2O)  167.37 (d, *J*1-P = 2.0 Hz, C-1), 166.58 (C-4’’), 152.14 (C-2’’), 141.98 (C-6’’), 102.93 (C-5’’), 88.69 (C-1’), 88.09 (d, *J*1exo-P = 189.8 Hz, C-1*exo*), 83.56 (d, *J*4’-P = 9.2 Hz, C-4’), 82.57 (C-4), 76.78 (d, *J*2-P = 12.5 Hz, C-2), 74.16 (C-3’), 74.13 (C-3), 70.46 (C-5), 69.88 (C-2’), 64.86 (d, *J*5’-P = 5.0 Hz, C-5’), 62.37 (C-6), 46.96 (CH2, NEt3), 8.53 (CH3, NEt3); 31P-NMR (100 MHz, D2O)  3.66 (d, *J* = 24.2 Hz) ; -11.58 (d, *J* = 23.3 Hz); MS (negatif ESI): m/z 561 100% (M - H)-, 280 60% (M - 2H)2-/2, 583 5% (M - 2H)-+Na; MS (positif FAB): m/z 585 M + Na; HRMS for C16H24O1N2P2Na: calcd. 585.0499 meas. 585.0488.

# References

1 A. Caravano, D. Mengin-Lecreulx, J. M. Brondello, S. P. Vincent and P. Sinaÿ *Chem. Eur. J.* **2003**, *23*, 5888-5898.

2 Q. Zhang and H.-w. Liu *J. Am. Chem. Soc.* **2001**, *123*, 6756-6766.
